# Supplementary material
Source: Springer Nature journal article supplement (https://www.springermedizin.de/resource/supplementary/12936_2013_3107_MOESM5_ESM.pdf/9545626)

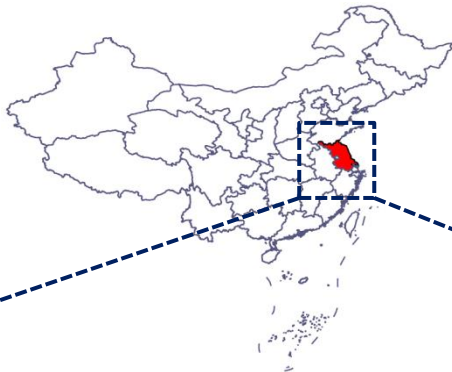

 Jiangsu Province

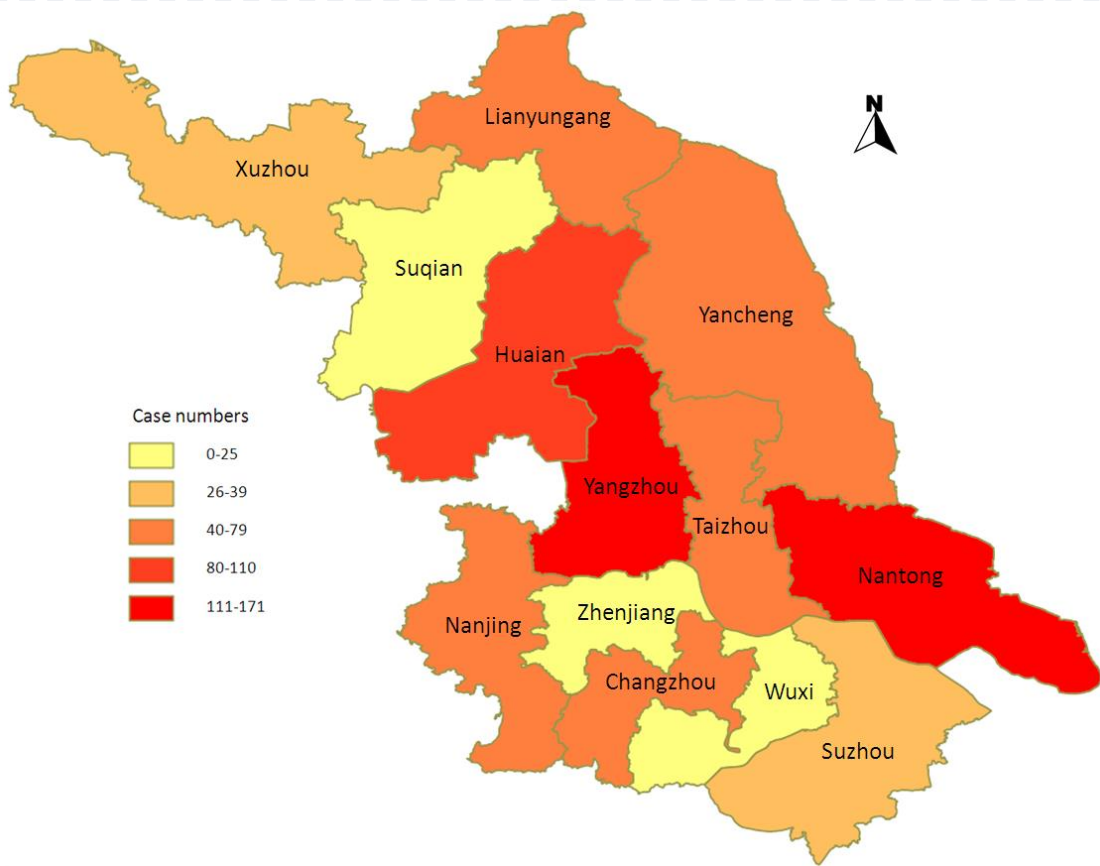

Supplement: MOESM5 [file 9545626]
